# Supplementary material for: CCR5 antagonist reduces HIV-induced amyloidogenesis, tau pathology, neurodegeneration, and blood-brain barrier alterations in HIV-infected hu-PBL-NSG mice
Source: PubMed Central journal article supplement (PMC8607567; doi:10.1186/s13024-021-00500-0), 2021-11-22

Supplemental Fig. 1

a

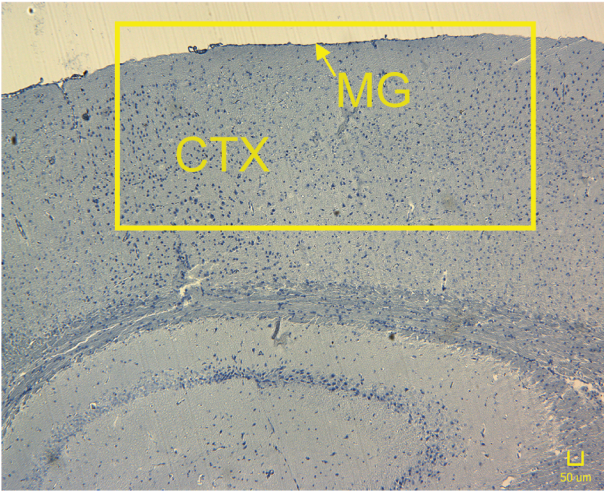

b

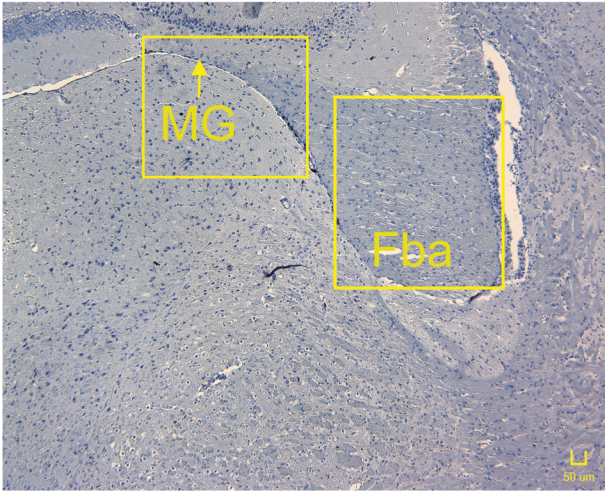

Supplement: 13024_2021_500_MOESM1_ESM.pdf [file 13024_2021_500_MOESM1_ESM.pdf]
