# Supplementary material for: CCR5 antagonist reduces HIV-induced amyloidogenesis, tau pathology, neurodegeneration, and blood-brain barrier alterations in HIV-infected hu-PBL-NSG mice
Source: PubMed Central journal article supplement (PMC8607567; doi:10.1186/s13024-021-00500-0), 2021-11-22
Supplement: 13024_2021_500_MOESM4_ESM.pdf [file 13024_2021_500_MOESM4_ESM.pdf]

# Reference: Manuscript #MOND-D-21-00138R1

## Figure 4c, original blots

Figure 4, panel c, Blot on Syngene image system

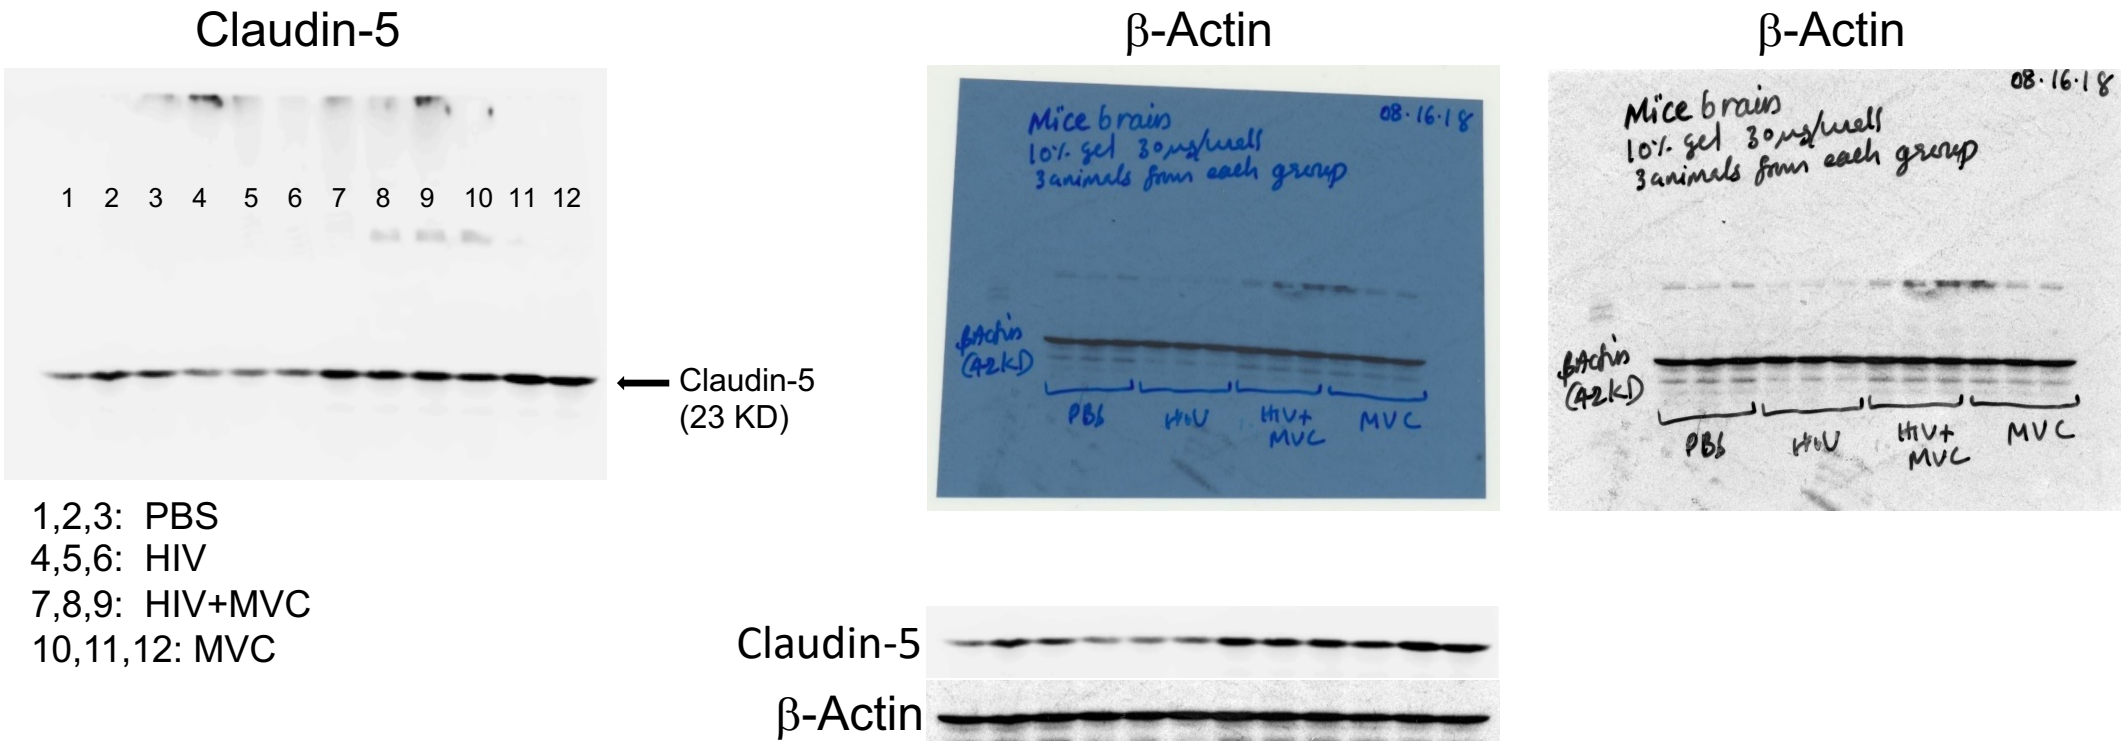

Figure 4 panel C

# Figure 4g, original blots

ZO-1

ZO-1

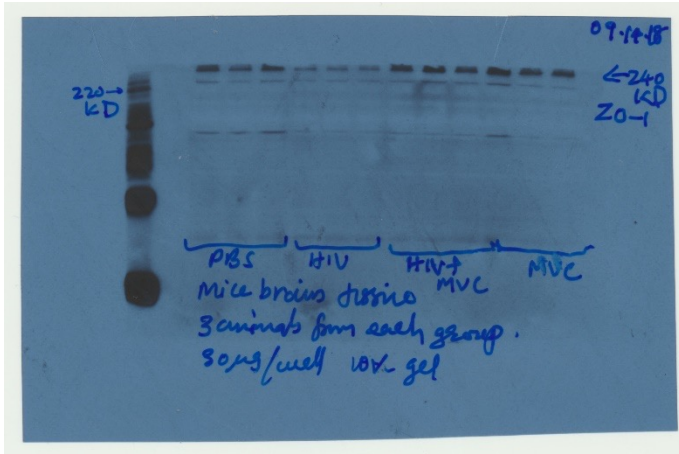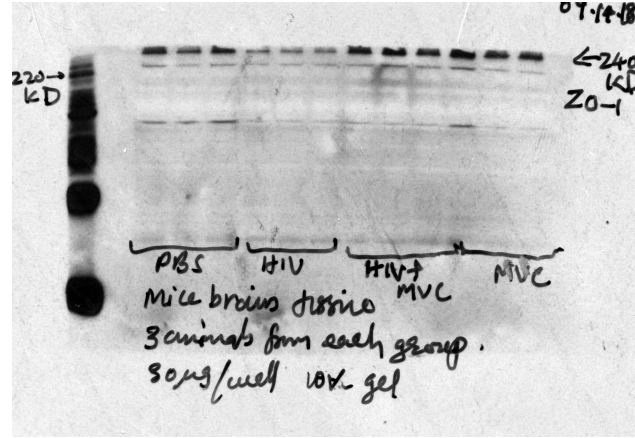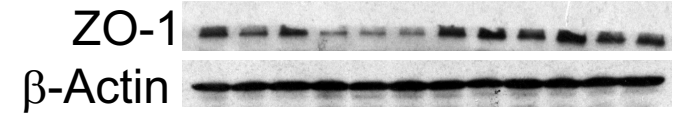

Figure 4 panel g

β-Actin

β-Actin

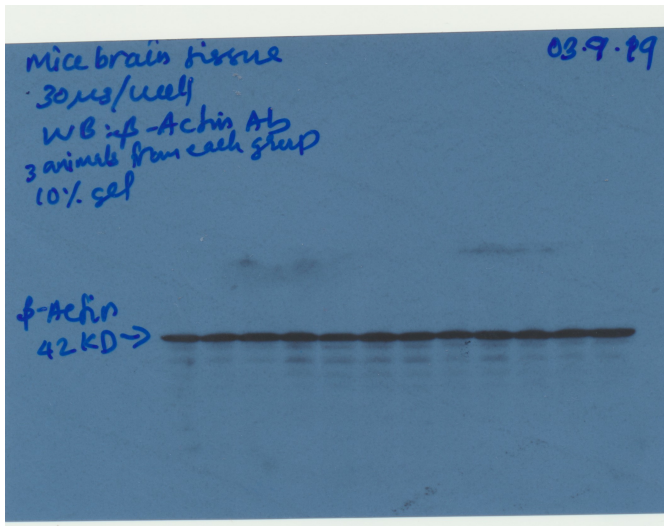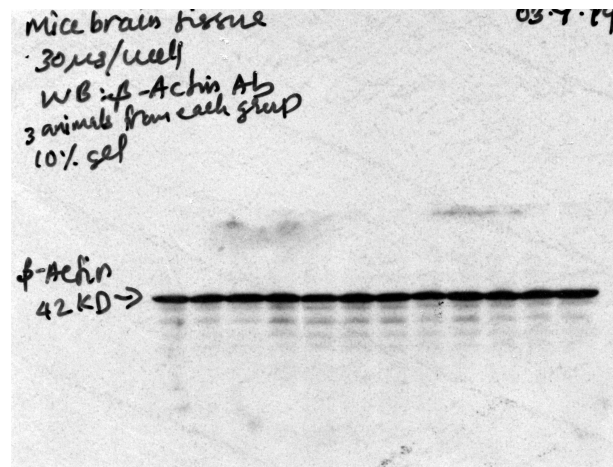

# Figure 4k, original blots

ZO-2

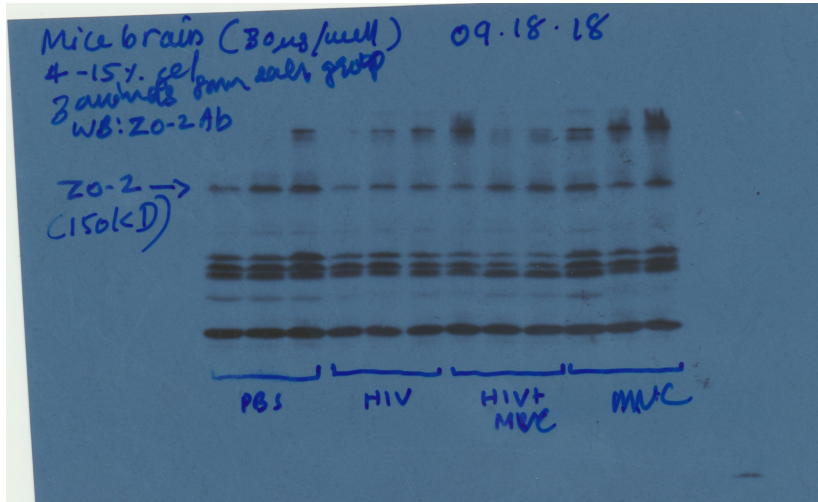

ZO-2

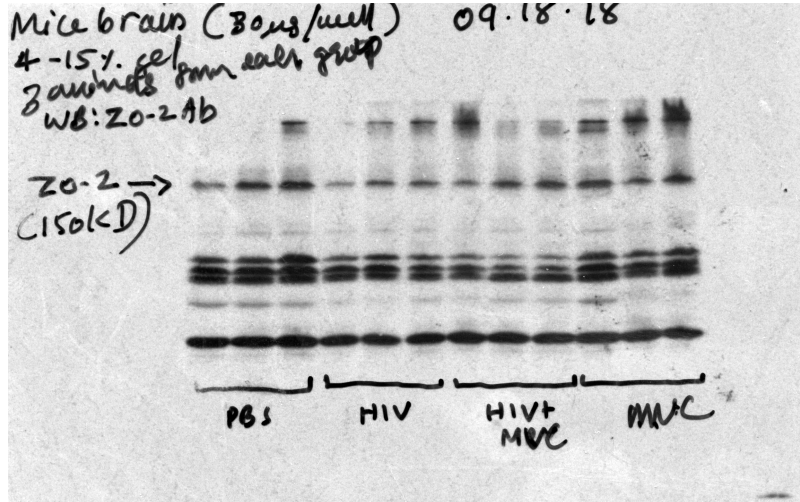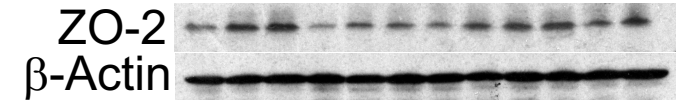

Figure 4 panel k

β-Actin

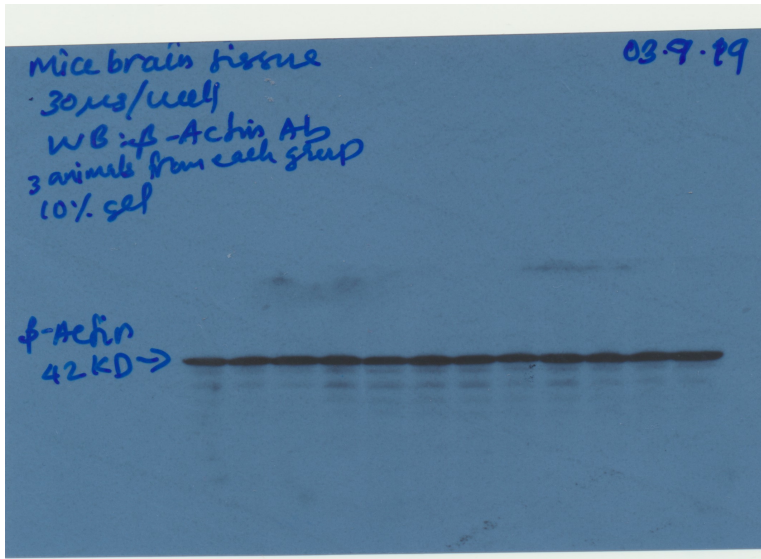

β-Actin

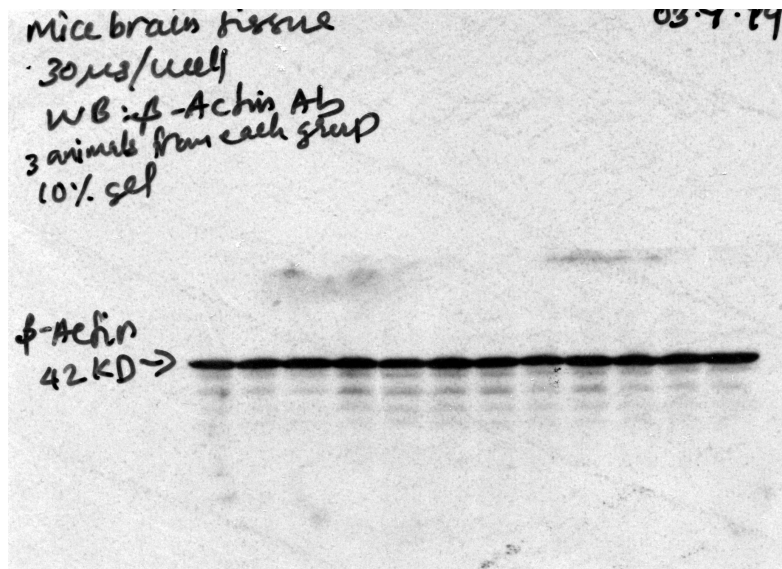

# Figure 5c, original blots

MAP-2

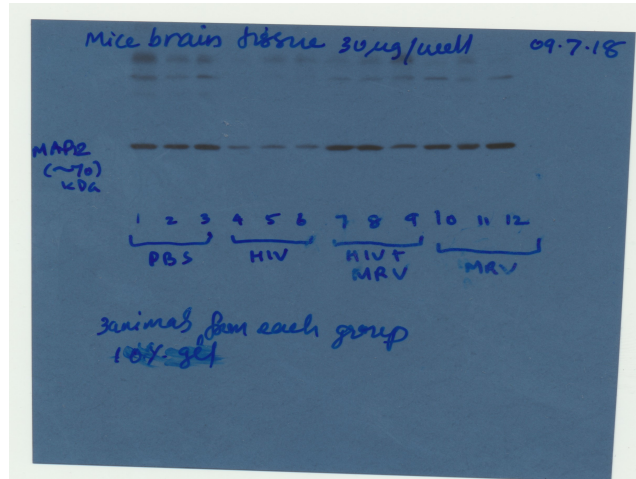

MAP-2

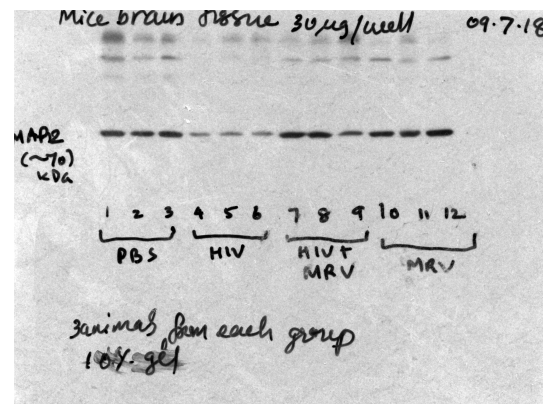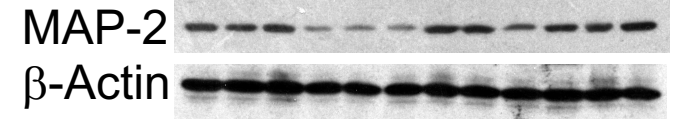

Figure 5 panel c

β-Actin

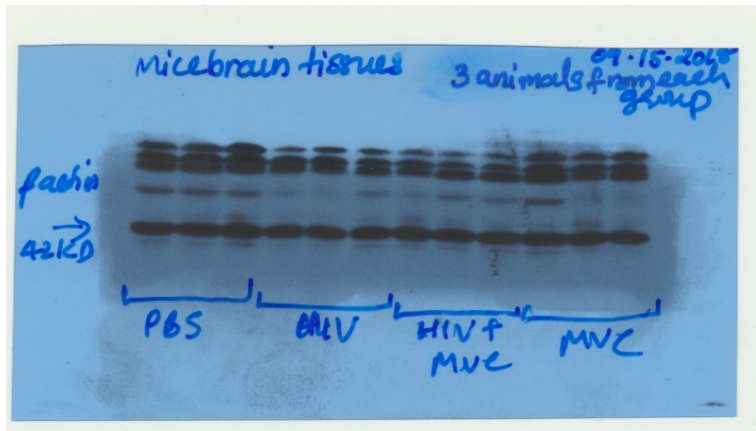

β-Actin

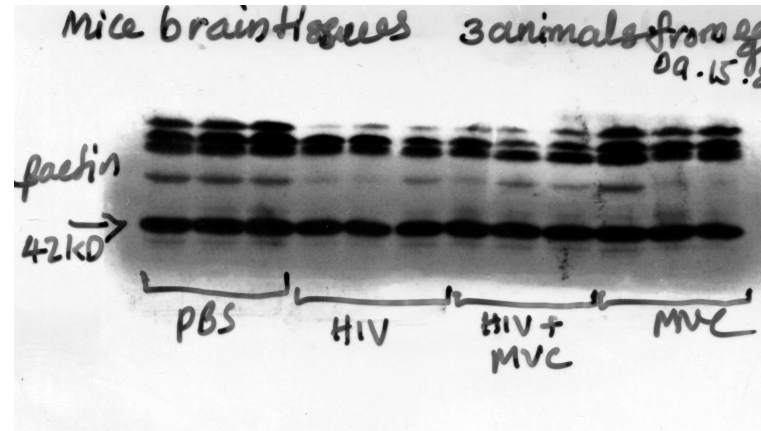

# Figure 5h, original blots

NeuN

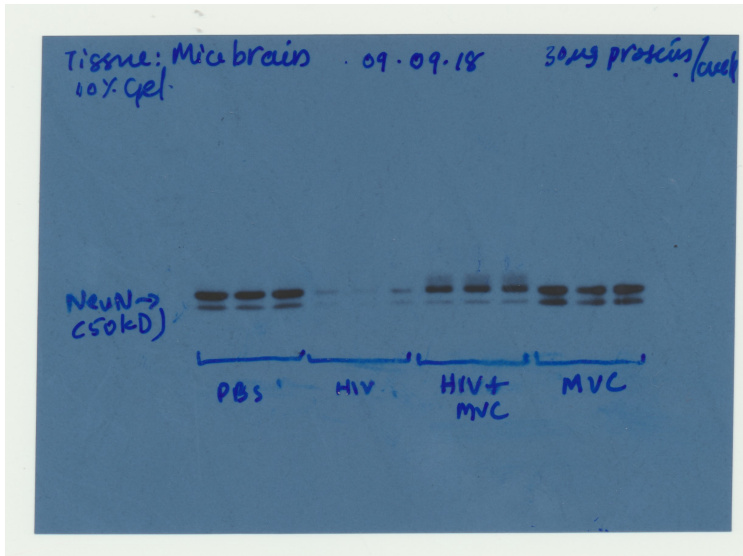

NeuN

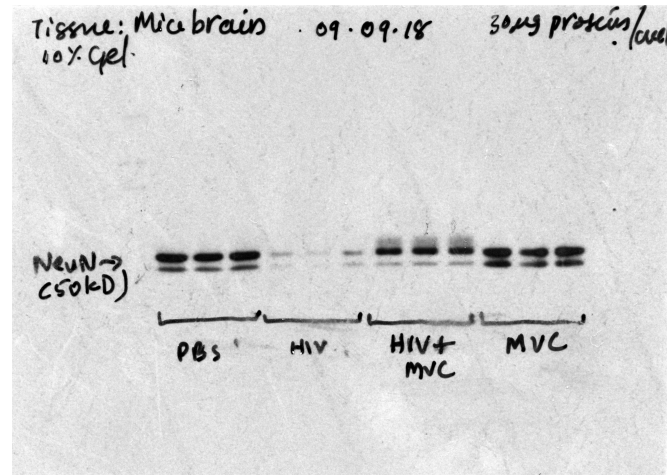

NeuN  
β-Actin

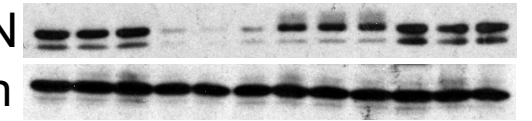

Figure 5 panel h

β-Actin

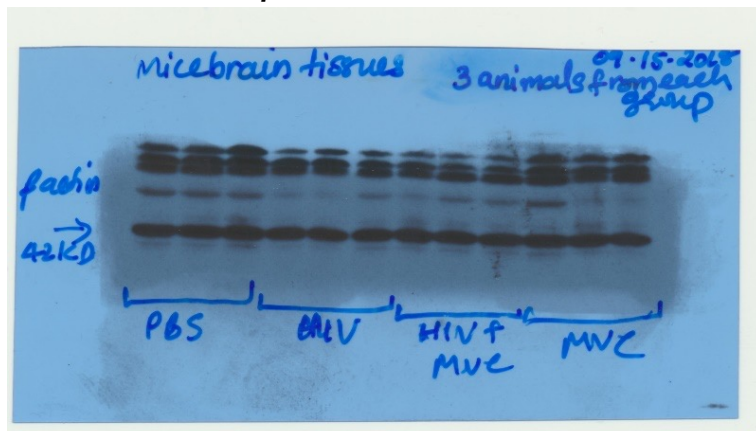

β-Actin

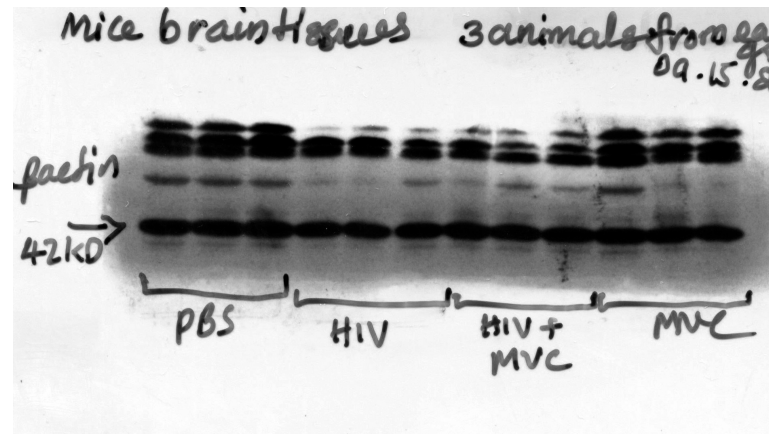

# Figure 6c, original blots

NFL

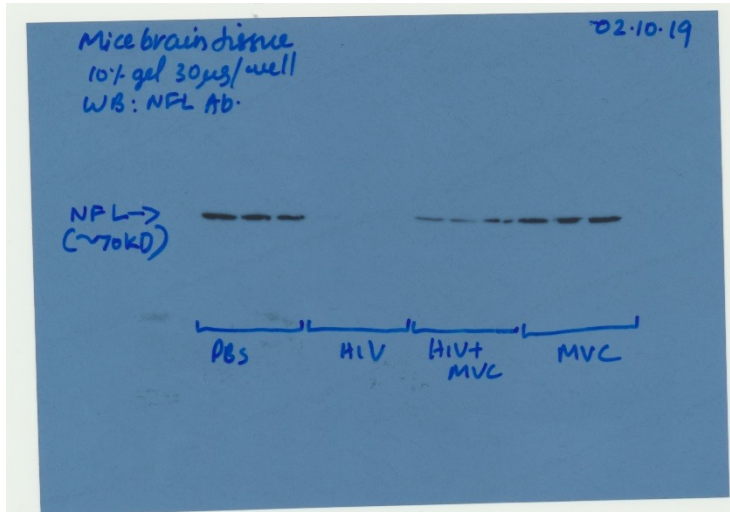

NFL

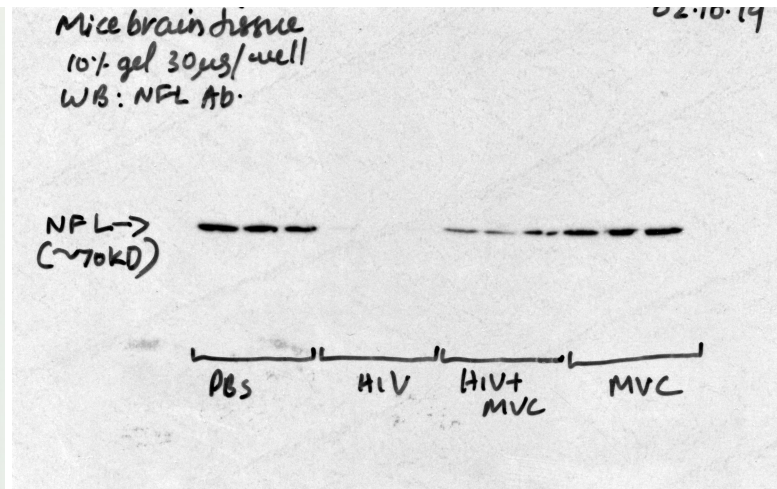

NFL  
β-Actin

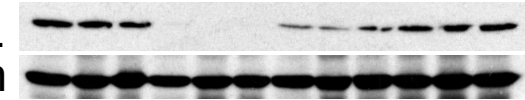

Figure 6 panel c

β-Actin

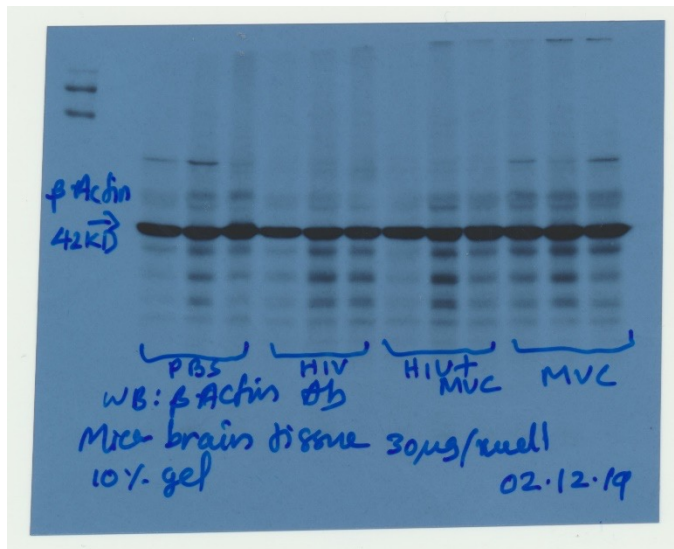

β-Actin

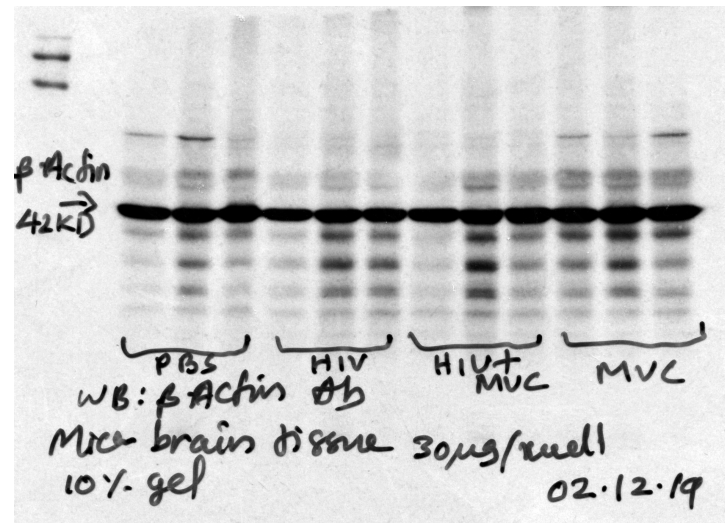

# Figure 7d, original blots

A $\beta$ -42

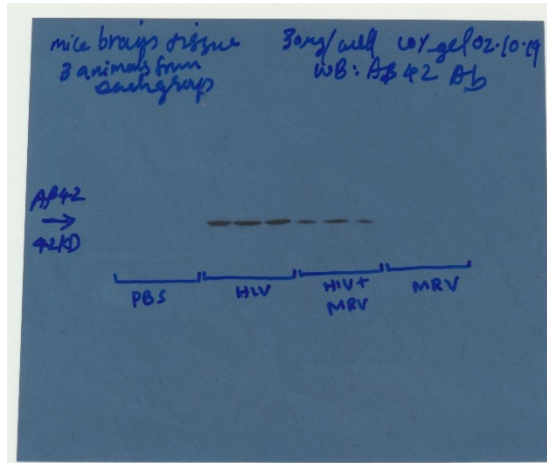

A $\beta$ -42

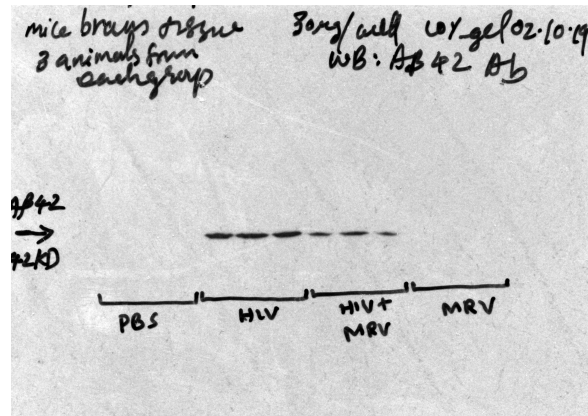

A $\beta$ -42

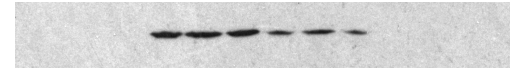

$\beta$ -Actin

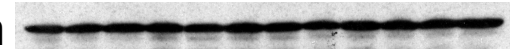

Figure 7 panel d

$\beta$ -Actin

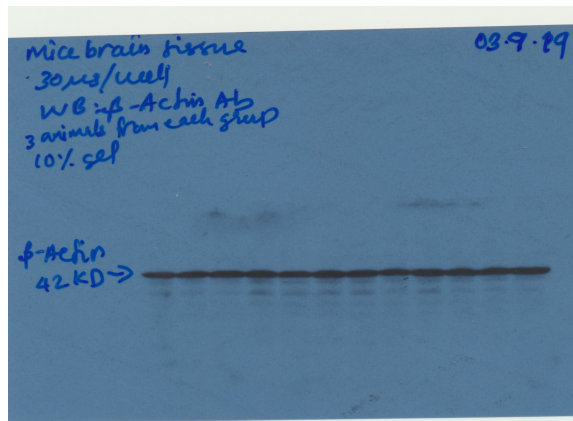

$\beta$ -Actin

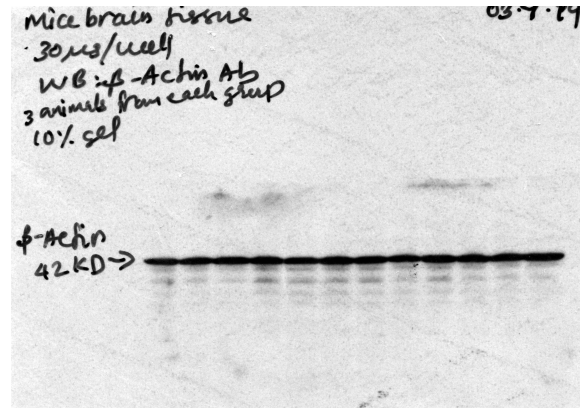

# Figure 8e, original blots

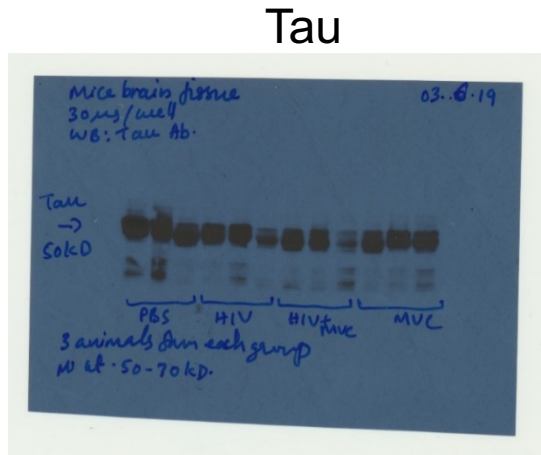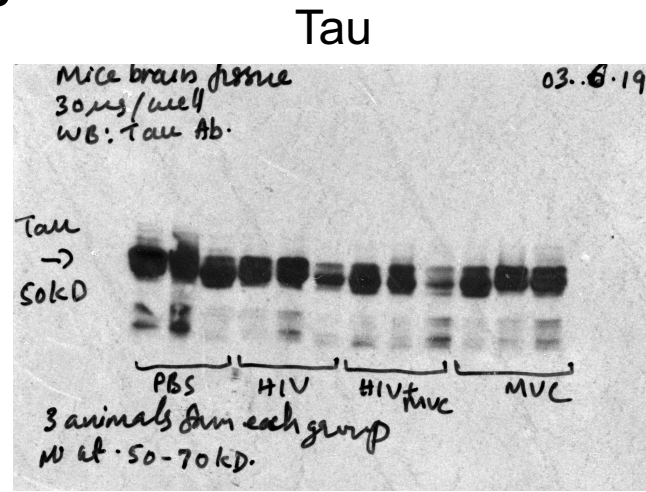

pTau (Thr181)

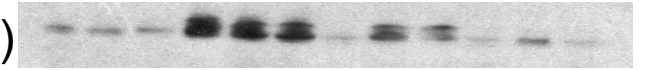

Tau

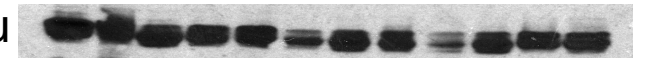

β-Actin

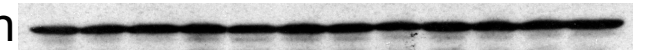

Figure 8 panel e

pTau (Thr181)

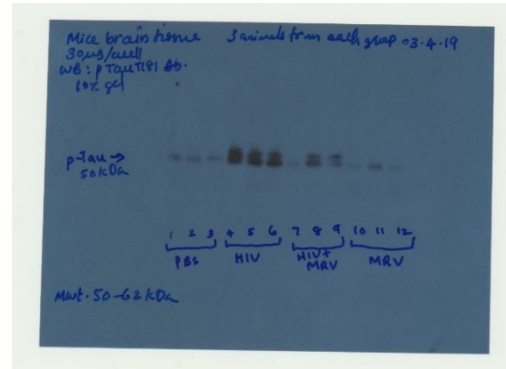

pTau (Thr181)

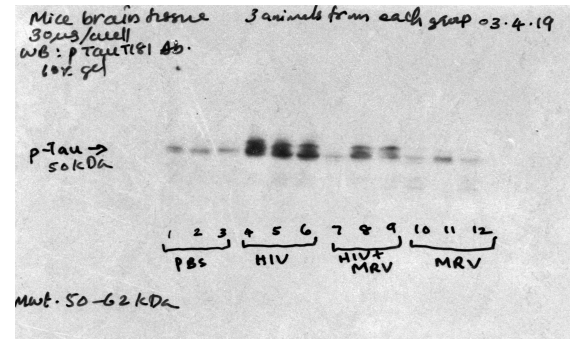

β-Actin

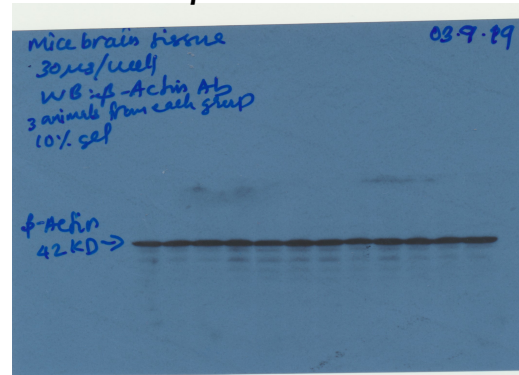

β-Actin

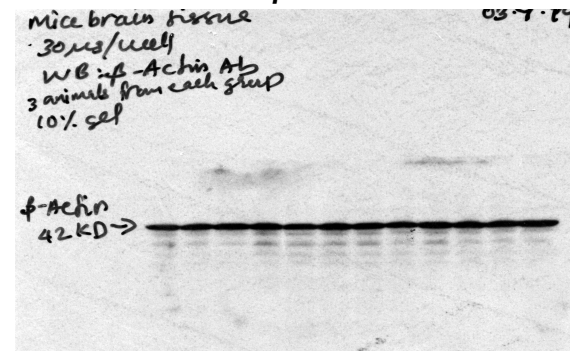



# Figure 8g, original blots

pTau (Ser396)

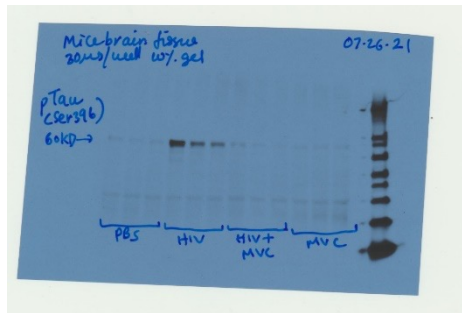

pTau (Ser396)

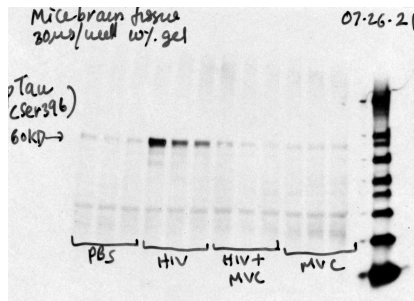

pTau (Ser199)

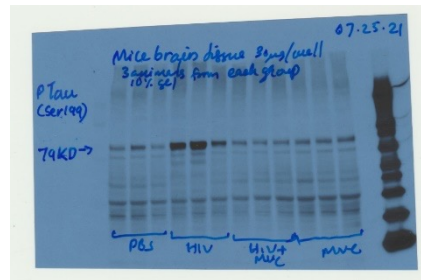

pTau (Ser199)

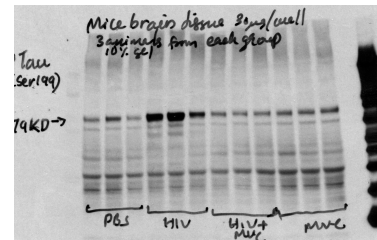

pTau (Ser396)

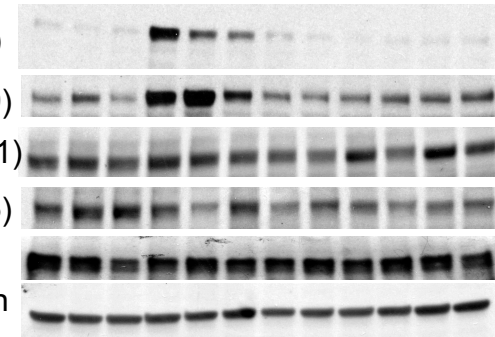

pTau (Thr231)

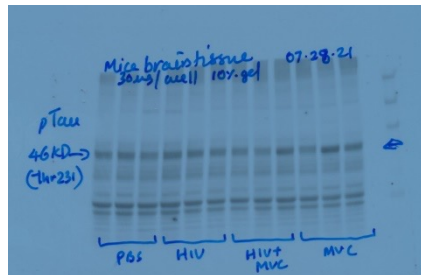

pTau (Thr231)

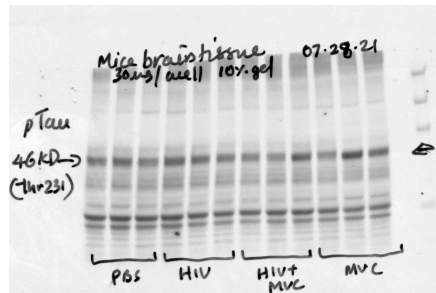

pTau (Thr205)

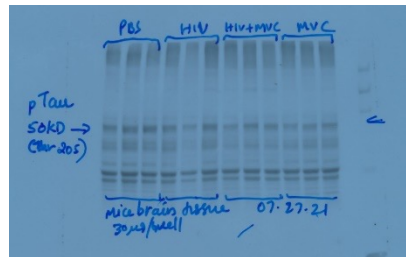

pTau (Thr205)

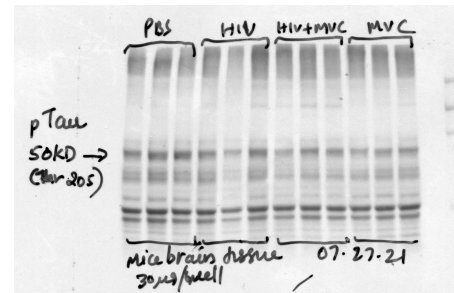

Figure 8 panel g

Tau

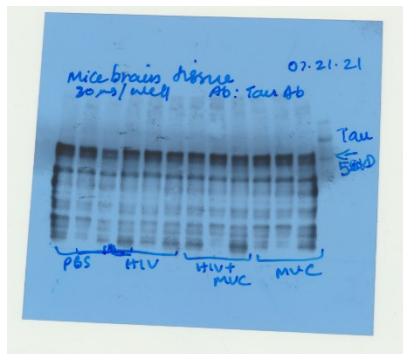

Tau

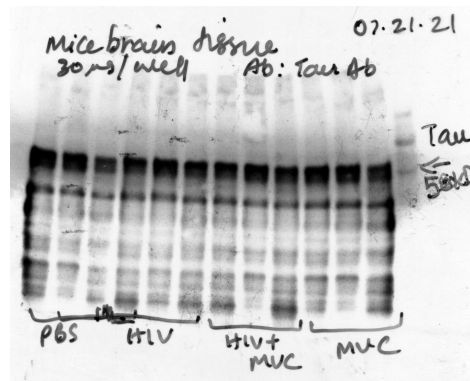

β-Actin

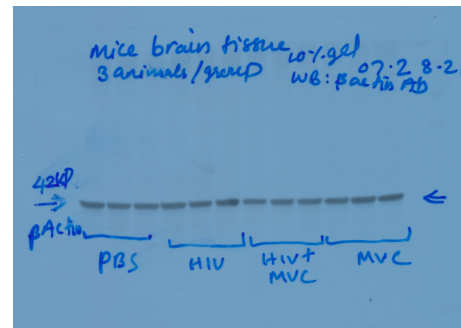

β-Actin

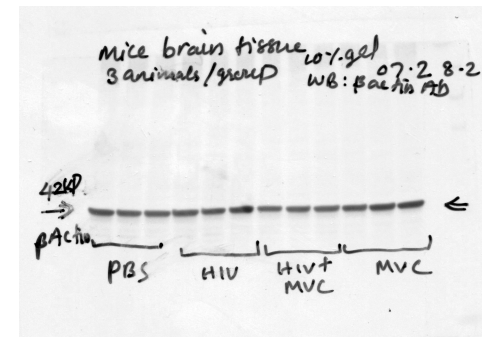

# Suppl Fig.3a, original blots

## LRP1

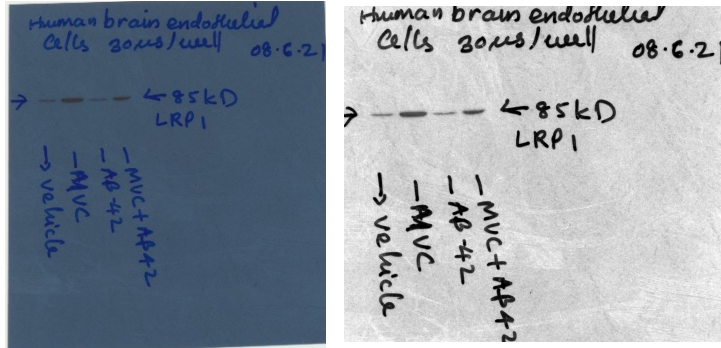

## RAGE

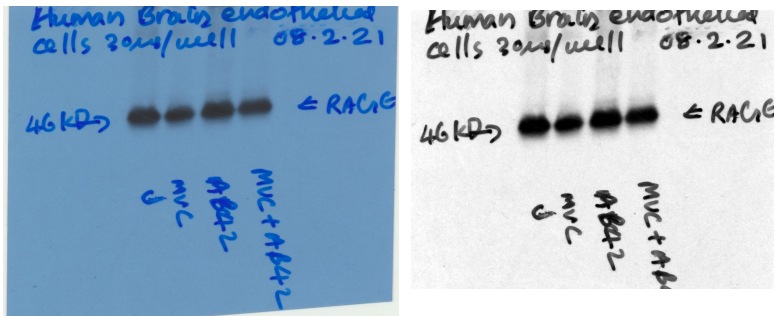

## β-Actin

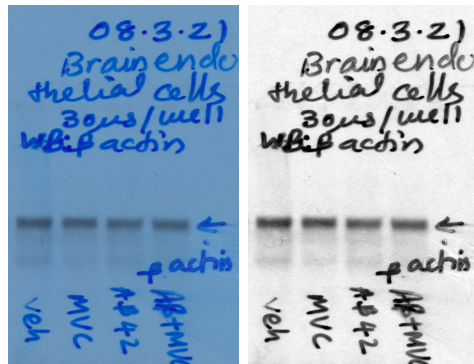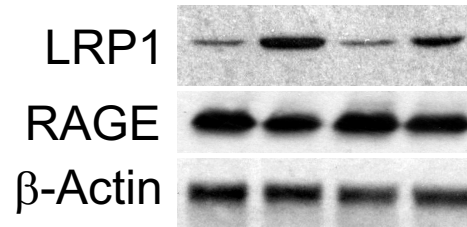

Supplemental Fig 3 panel a
