# Supplementary material for: CCR5 antagonist reduces HIV-induced amyloidogenesis, tau pathology, neurodegeneration, and blood-brain barrier alterations in HIV-infected hu-PBL-NSG mice
Source: PubMed Central journal article supplement (PMC8607567; doi:10.1186/s13024-021-00500-0), 2021-11-22
Supplement: 13024_2021_500_MOESM5_ESM.pdf [file 13024_2021_500_MOESM5_ESM.pdf]

## Additional File 2

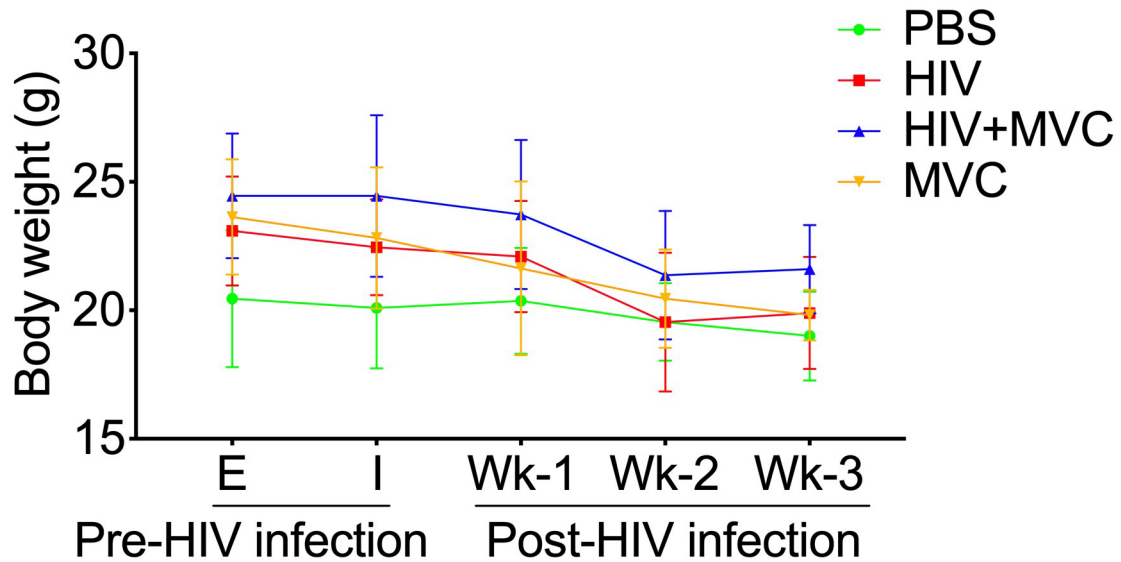

**Additional File 2:** Animals' weight before (pre) and after (post) infection. Data show animals' weight on the day of PBL engraftment (E), HIV-1 infection (I), and at week-1, week-2, and week-3 post-infection. Sample size: 11 animals in each group.
